# Supplementary material
Source: PubMed Central journal article supplement (PMC365737)

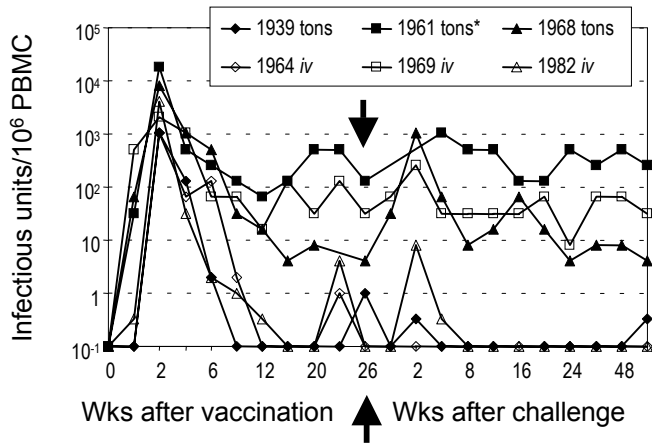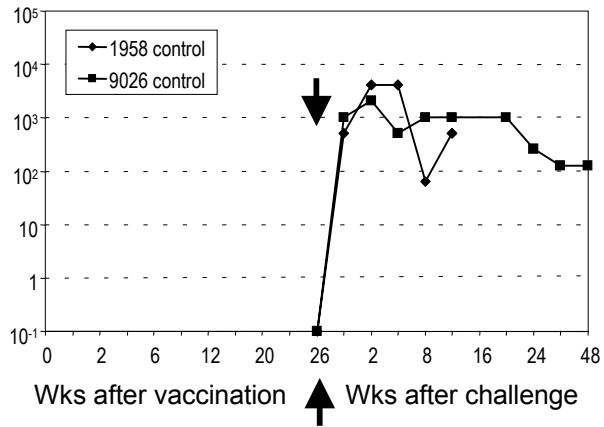

Supplement: pnas_101_9_3017__2.pdf [file pnas_101_9_3017__2.pdf]
